# Supplementary material for: Identification of mucin degraders of the human gut microbiota
Source: Springer Nature journal article supplement (doi:10.1038/s41598-021-90553-4), 2021-05-27
Supplement: MOESM1 [file 41598_2021_90553_MOESM1_ESM.pdf]

## Identification of mucin degraders of the human gut microbiota

Stefano Raimondi<sup>1†</sup>, Eliana Musmeci<sup>1†</sup>, Francesco Candelieri<sup>1</sup>, Alberto Amaretti<sup>1,2</sup>, and Maddalena Rossi<sup>1,2,\*</sup>

<sup>1</sup>Department of Life Sciences, University of Modena and Reggio Emilia, 41125 Modena, Italy

<sup>2</sup>Biogest-Siteia, University of Modena and Reggio Emilia, 42122 Reggio Emilia, Italy

<sup>†</sup>The authors contributed equally to this work

\*corresponding author: maddalena.rossi@unimore.it

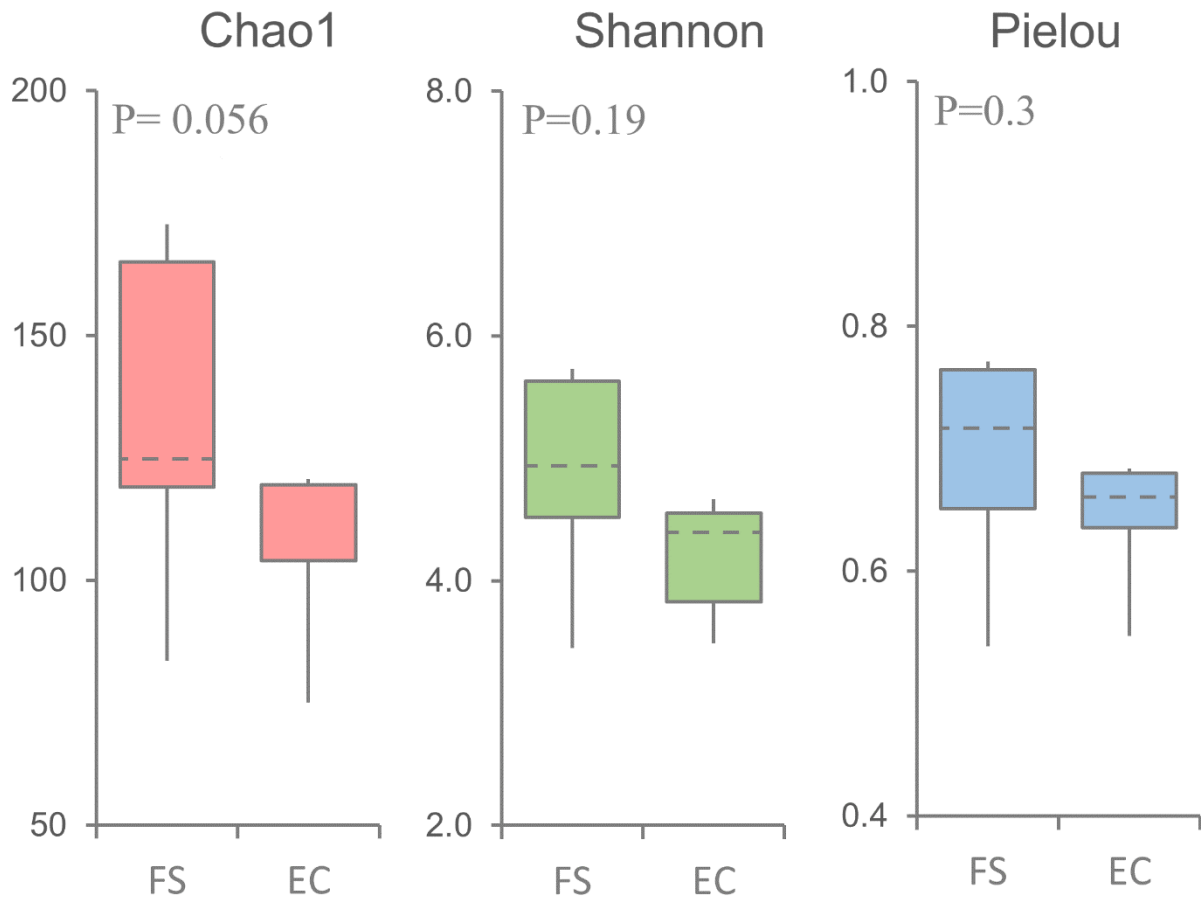

Supplementary Figure 1. Alpha diversity metrics, comprising Chao1, Shannon, and Pielou indexes, of the microbiota in FS and EC samples. The median (dashed line), the 25<sup>th</sup> and 75<sup>th</sup> percentiles (colored box), the 10<sup>th</sup> and 90<sup>th</sup> percentiles (whiskers), are indicated. Paired FS and EC samples were compared with Kruskal-Wallis test, considering significant difference for  $P < 0.05$ .

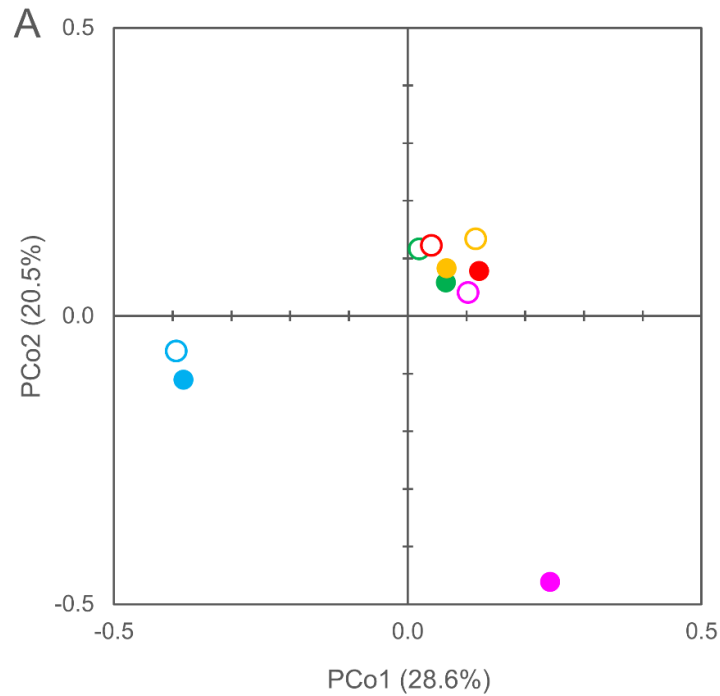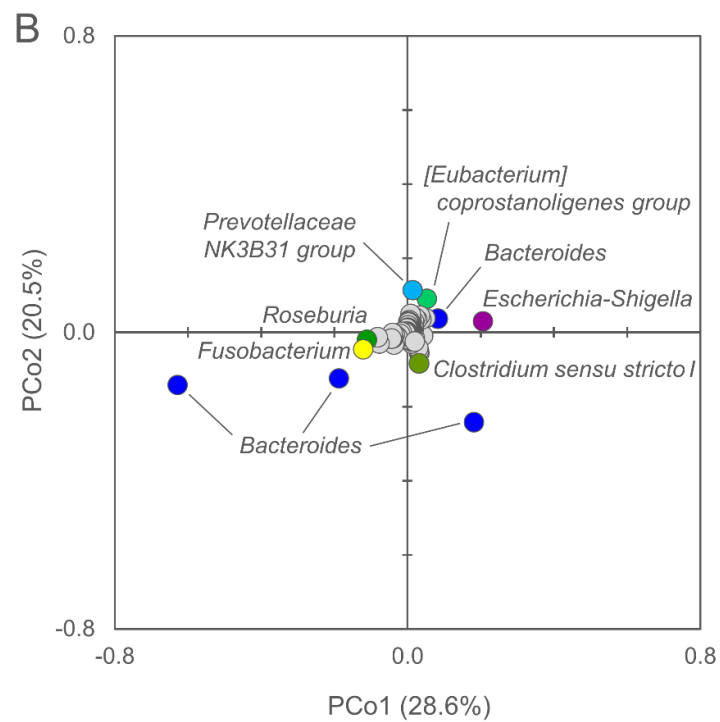

Supplementary Figure 2 Beta diversity analysis of the microbiota in FS and EC samples. Panel A, PCo1-PCo2 visualization of distances computed with Unweighted Unifrac. Symbols: FS, empty circle; EC, full circle; different colors correspond to different subjects (1, fuchsia; 2, cyan; 3, green; 4, red; 5, yellow). Panel B, PCo1-PCo2 visualization of the contribution of each ASV. The 10 ASVs exerting the highest effect on PCo1 are labelled and colored according to their phylum (Firmicutes, green; Bacteroidetes, blue; Preteobacteria, purple; Fusobacteria, yellow).
