# Supplementary material for: Identification of mucin degraders of the human gut microbiota
Source: Sci Rep. 2021 May 27;11:11094. doi: 10.1038/s41598-021-90553-4 (PMC8159939; doi:10.1038/s41598-021-90553-4)
Supplement: Supplementary file 2 — Supplementary Information 2. [file 41598_2021_90553_MOESM2_ESM.xlsx]

## Sheet: OTUs Table
Supplementary Table 1: Reads dereplicated into ASVs hitting a reference sequence in Silva database and collapsed at the 7th level of taxonomic annotation into 150 OTUs
Phylum	Class	Order	Family	Genus	Species	1-FS	1-EC	2-FS	2-EC	3-FS	3-EC	4-FS	4-EC	5-FS	5-EC
Actinobacteriota	Actinobacteria	Actinomycetales	Actinomycetaceae	Actinomyces		0	0	0	0	4	0	2	0	0	0
Actinobacteriota	Actinobacteria	Bifidobacteriales	Bifidobacteriaceae	Bifidobacterium		8	0	109	53	65	20	219	66	22	13
Actinobacteriota	Coriobacteriia	Coriobacteriales	Atopobiaceae	Atopobiaceae_others		0	0	0	0	8	0	0	0	0	0
Actinobacteriota	Coriobacteriia	Coriobacteriales	Atopobiaceae	Coriobacteriaceae_UCG-002		0	0	0	0	0	0	0	3	0	0
Actinobacteriota	Coriobacteriia	Coriobacteriales	Atopobiaceae	Olsenella		0	0	0	0	14	0	0	0	0	0
Actinobacteriota	Coriobacteriia	Coriobacteriales	Coriobacteriaceae	Collinsella		18	0	44	92	62	199	0	0	63	5
Actinobacteriota	Coriobacteriia	Coriobacteriales	Coriobacteriales_Incertae_Sedis			0	0	0	0	6	0	30	0	0	0
Actinobacteriota	Coriobacteriia	Coriobacteriales	Eggerthellaceae	Adlercreutzia		0	0	0	0	0	0	0	0	12	0
Actinobacteriota	Coriobacteriia	Coriobacteriales	Eggerthellaceae	Eggerthella		0	6	0	0	0	0	0	33	0	27
Actinobacteriota	Coriobacteriia	Coriobacteriales	Eggerthellaceae	Eggerthellaceae_others		29	0	0	0	0	0	17	0	0	0
Actinobacteriota	Coriobacteriia	Coriobacteriales	Eggerthellaceae	Enterorhabdus		0	0	0	5	0	0	0	0	0	0
Actinobacteriota	Coriobacteriia	Coriobacteriales	Eggerthellaceae	Gordonibacter		0	0	0	0	0	0	0	7	0	0
Actinobacteriota	Coriobacteriia	Coriobacteriales	Eggerthellaceae	Senegalimassilia		13	26	0	0	0	0	0	0	0	0
Actinobacteriota	Coriobacteriia	Coriobacteriales	Eggerthellaceae	Slackia		0	0	0	0	0	0	0	0	33	37
Bacteroidota	Bacteroidia	Bacteroidales	Bacteroidaceae	Bacteroides		9917	24432	25654	18242	17160	14945	18348	14860	6028	5565
Bacteroidota	Bacteroidia	Bacteroidales	Bacteroidales_others			0	0	0	0	0	0	0	0	344	25
Bacteroidota	Bacteroidia	Bacteroidales	Barnesiellaceae	Barnesiella		740	35	0	0	0	0	0	4	0	0
Bacteroidota	Bacteroidia	Bacteroidales	Barnesiellaceae	Barnesiellaceae_others		235	0	0	0	17	8	0	0	83	0
Bacteroidota	Bacteroidia	Bacteroidales	Barnesiellaceae	Coprobacter	Coprobacter_others	22	0	0	0	0	0	0	0	0	0
Bacteroidota	Bacteroidia	Bacteroidales	Barnesiellaceae	Coprobacter	Coprobacter_secundus	112	4	0	0	168	18	0	0	0	0
Bacteroidota	Bacteroidia	Bacteroidales	Marinifilaceae	Butyricimonas		146	0	0	0	180	0	0	3	171	6
Bacteroidota	Bacteroidia	Bacteroidales	Marinifilaceae	Odoribacter		176	0	0	0	193	290	169	130	151	0
Bacteroidota	Bacteroidia	Bacteroidales	Muribaculaceae	Muribaculaceae_CAG-873		5	0	0	0	0	0	0	0	0	0
Bacteroidota	Bacteroidia	Bacteroidales	Muribaculaceae	Muribaculaceae_others		2051	0	2	0	0	0	23	6	485	12
Bacteroidota	Bacteroidia	Bacteroidales	Porphyromonadaceae	Porphyromonas		3	0	0	0	0	0	0	0	0	0
Bacteroidota	Bacteroidia	Bacteroidales	Prevotellaceae	Alloprevotella		0	0	0	0	0	0	0	0	850	0
Bacteroidota	Bacteroidia	Bacteroidales	Prevotellaceae	Paraprevotella		0	0	0	0	442	0	0	0	374	0
Bacteroidota	Bacteroidia	Bacteroidales	Prevotellaceae	Prevotella		7	0	8	7	0	0	0	0	243	0
Bacteroidota	Bacteroidia	Bacteroidales	Prevotellaceae	Prevotellaceae_NK3B31_group		0	19	10	8	16752	0	0	0	6	0
Bacteroidota	Bacteroidia	Bacteroidales	Prevotellaceae	Prevotellaceae_others		0	0	0	0	0	0	0	0	279	0
Bacteroidota	Bacteroidia	Bacteroidales	Rikenellaceae	Alistipes	Alistipes_inops	29	0	0	0	0	0	0	0	0	0
Bacteroidota	Bacteroidia	Bacteroidales	Rikenellaceae	Alistipes	Alistipes_others	1885	159	0	270	1655	911	845	260	5374	198
Bacteroidota	Bacteroidia	Bacteroidales	Rikenellaceae	Rikenellaceae_RC9_gut_group		0	0	2	0	0	0	0	15	0	0
Bacteroidota	Bacteroidia	Bacteroidales	Tannerellaceae	Parabacteroides		1416	4486	12	0	2148	1190	1036	3851	1434	836
Bacteroidota	Bacteroidia	Flavobacteriales	Flavobacteriaceae			0	0	0	0	0	0	0	0	73	2
Campilobacterota	Campylobacteria	Campylobacterales	Campylobacteraceae	Campylobacter		0	0	0	0	0	0	0	0	3	0
Desulfobacterota	Desulfovibrionia	Desulfovibrionales	Desulfovibrionaceae	Bilophila		25	133	0	0	58	194	9	145	35	62
Desulfobacterota	Desulfovibrionia	Desulfovibrionales	Desulfovibrionaceae	Desulfovibrio		248	1159	0	0	0	0	0	0	0	0
Firmicutes	Bacilli	Bacilli_RF39	Bacilli_RF39	Bacilli_RF39		19	0	0	0	0	0	0	0	855	0
Firmicutes	Bacilli	Erysipelotrichales	Erysipelatoclostridiaceae	Asteroleplasma		0	0	0	0	0	0	0	0	36	0
Firmicutes	Bacilli	Erysipelotrichales	Erysipelatoclostridiaceae	Coprobacillus	Coprobacillus_cateniformis	29	5	0	0	0	0	0	0	0	2
Firmicutes	Bacilli	Erysipelotrichales	Erysipelatoclostridiaceae	Erysipelatoclostridiaceae_others	Firmicutes_bacterium_CAG345	62	0	0	0	0	0	0	0	0	0
Firmicutes	Bacilli	Erysipelotrichales	Erysipelatoclostridiaceae	Erysipelatoclostridium		0	0	0	139	0	26	6	33	0	0
Firmicutes	Bacilli	Erysipelotrichales	Erysipelatoclostridiaceae	Erysipelotrichaceae_UCG-003		48	0	0	0	0	0	13	0	22	0
Firmicutes	Bacilli	Erysipelotrichales	Erysipelotrichaceae	[Clostridium]_innocuum_group		0	37	0	3501	0	0	0	19	5	0
Firmicutes	Bacilli	Erysipelotrichales	Erysipelotrichaceae	Dielma		3	0	0	0	0	0	0	0	0	322
Firmicutes	Bacilli	Erysipelotrichales	Erysipelotrichaceae	Holdemanella		0	0	0	0	66	0	163	0	0	0
Firmicutes	Bacilli	Erysipelotrichales	Erysipelotrichaceae	Holdemania		2	19	0	0	0	212	9	166	0	23
Firmicutes	Bacilli	Erysipelotrichales	Erysipelotrichaceae	Merdibacter		17	0	0	0	0	0	0	0	0	0
Firmicutes	Bacilli	Erysipelotrichales	Erysipelotrichaceae	Turicibacter		0	0	0	0	3	0	51	0	127	0
Firmicutes	Bacilli	Izemoplasmatales	Izemoplasmatales	Izemoplasmatales		34	24	0	0	0	0	0	48	0	0
Firmicutes	Bacilli	Lactobacillales	Enterococcaceae	Enterococcus	Enterococcus_durans	0	146	0	0	0	3	0	0	0	7
Firmicutes	Bacilli	Lactobacillales	Enterococcaceae	Enterococcus	Enterococcus_faecalis	0	0	0	0	0	0	0	12	0	0
Firmicutes	Bacilli	Lactobacillales	Enterococcaceae	Enterococcus	Enterococcus_others	0	0	0	0	0	0	0	5	0	0
Firmicutes	Bacilli	Lactobacillales	Lactobacillaceae	Lactobacillus		0	0	0	0	0	0	10	0	0	0
Firmicutes	Bacilli	Lactobacillales	Streptococcaceae	Streptococcus	Streptococcus_others	34	2	11	0	0	0	140	0	50	0
Firmicutes	Bacilli	Lactobacillales	Streptococcaceae	Streptococcus	Streptococcus_salivarius	0	0	0	0	13	0	104	0	0	0
Firmicutes	Clostridia	Christensenellales	Christensenellaceae	Catabacter		0	0	0	0	0	0	0	5	0	0
Firmicutes	Clostridia	Christensenellales	Christensenellaceae	Christensenellaceae_others		5	0	0	0	0	0	0	5	0	0
Firmicutes	Clostridia	Christensenellales	Christensenellaceae	Christensenellaceae_R-7_group		2312	169	0	0	73	55	90	58	656	29
Firmicutes	Clostridia	Clostridia_others	Hungateiclostridiaceae	Ruminiclostridium		0	0	0	0	0	0	0	7	0	0
Firmicutes	Clostridia	Clostridia_others				0	0	0	0	0	0	0	6	7	3
Firmicutes	Clostridia	Clostridia_UCG-014	Clostridia_UCG-014	Clostridia_UCG-014		314	0	0	0	0	0	0	0	222	0
Firmicutes	Clostridia	Clostridia_vadinBB60_group	Clostridia_vadinBB60_group	Clostridia_vadinBB60_group		126	339	0	0	119	25	25	42	58	4
Firmicutes	Clostridia	Clostridiales	Clostridiaceae	Clostridium_sensu_stricto_1		43	5353	9	0	36	642	264	419	227	666
Firmicutes	Clostridia	Lachnospirales	Defluviitaleaceae	Defluviitaleaceae_UCG-011		0	0	0	0	3	0	4	0	0	0
Firmicutes	Clostridia	Lachnospirales	Lachnospiraceae	[Eubacterium]_ventriosum_group		8	0	56	0	22	0	48	0	92	0
Firmicutes	Clostridia	Lachnospirales	Lachnospiraceae	[Ruminococcus]_torques_group		0	0	0	0	0	0	45	1058	0	0
Firmicutes	Clostridia	Lachnospirales	Lachnospiraceae	Agathobacter		0	0	0	0	196	0	0	0	0	0
Firmicutes	Clostridia	Lachnospirales	Lachnospiraceae	Anaerostipes		0	0	53	0	0	0	0	0	0	0
Firmicutes	Clostridia	Lachnospirales	Lachnospiraceae	Blautia		518	9	403	253	395	151	273	38	411	30
Firmicutes	Clostridia	Lachnospirales	Lachnospiraceae	Butyrivibrio		0	0	0	0	0	0	0	0	84	0
Firmicutes	Clostridia	Lachnospirales	Lachnospiraceae	Coprococcus		275	0	0	0	0	0	283	0	195	0
Firmicutes	Clostridia	Lachnospirales	Lachnospiraceae	Frisingicoccus		0	0	0	0	66	0	0	0	0	0
Firmicutes	Clostridia	Lachnospirales	Lachnospiraceae	Fusicatenibacter		52	0	174	0	159	0	666	0	192	0
Firmicutes	Clostridia	Lachnospirales	Lachnospiraceae	Howardella		0	0	0	0	6	0	0	0	0	0
Firmicutes	Clostridia	Lachnospirales	Lachnospiraceae	Hungatella		0	56	0	0	0	137	0	356	89	35
Firmicutes	Clostridia	Lachnospirales	Lachnospiraceae	Lachnoclostridium		0	207	0	92	0	288	216	432	31	208
Firmicutes	Clostridia	Lachnospirales	Lachnospiraceae	Lachnospira		0	0	1798	0	473	0	0	0	325	0
Firmicutes	Clostridia	Lachnospirales	Lachnospiraceae	Lachnospiraceae_FCS020_group		0	7	0	0	0	0	0	0	0	0
Firmicutes	Clostridia	Lachnospirales	Lachnospiraceae	Lachnospiraceae_ND3007_group		23	0	0	0	0	0	77	0	118	0
Firmicutes	Clostridia	Lachnospirales	Lachnospiraceae	Lachnospiraceae_NK4A136_group		151	0	0	0	152	0	1397	0	688	0
Firmicutes	Clostridia	Lachnospirales	Lachnospiraceae	Lachnospiraceae_others		2067	2568	2744	7639	1983	1330	4822	1485	2079	2657
Firmicutes	Clostridia	Lachnospirales	Lachnospiraceae	Lachnospiraceae_UCG-004		46	0	555	1419	169	0	0	0	0	49
Firmicutes	Clostridia	Lachnospirales	Lachnospiraceae	Roseburia		0	0	4655	0	338	0	117	0	0	0
Firmicutes	Clostridia	Lachnospirales	Lachnospiraceae	Sellimonas		0	0	0	59	17	16	22	37	0	0
Firmicutes	Clostridia	Lachnospirales	Lachnospiraceae	Tyzzerella		0	0	0	0	10	67	30	0	69	0
Firmicutes	Clostridia	Monoglobales	Monoglobaceae	Monoglobus		66	0	69	0	33	0	134	0	12	0
Firmicutes	Clostridia	Oscillospirales	Oscillospirales	[Eubacterium]_coprostanoligenes_group		146	0	0	0	167	93	698	51	7574	6
Firmicutes	Clostridia	Oscillospirales	Butyricicoccaceae	Butyricicoccaceae_UCG-009		0	0	0	0	0	9	0	13	6	29
Firmicutes	Clostridia	Oscillospirales	Butyricicoccaceae	Butyricicoccus		75	0	190	12	49	5	163	0	50	7
Firmicutes	Clostridia	Oscillospirales	Oscillospiraceae	Colidextribacter		50	29	0	0	246	82	44	213	0	210
Firmicutes	Clostridia	Oscillospirales	Oscillospiraceae	Flavonifractor		20	360	0	192	40	23	0	0	0	0
Firmicutes	Clostridia	Oscillospirales	Oscillospiraceae	Oscillibacter		0	1146	0	0	271	196	54	150	0	35
Firmicutes	Clostridia	Oscillospirales	Oscillospiraceae	Oscillospiraceae_NK4A214_group		57	0	0	0	23	117	104	227	97	167
Firmicutes	Clostridia	Oscillospirales	Oscillospiraceae	Oscillospiraceae_others		119	1798	28	205	168	1245	113	910	107	509
Firmicutes	Clostridia	Oscillospirales	Oscillospiraceae	Oscillospiraceae_UCG-002		364	620	0	0	14	242	123	1111	1983	720
Firmicutes	Clostridia	Oscillospirales	Oscillospiraceae	Oscillospiraceae_UCG-003		19	624	0	0	0	0	0	0	241	66
Firmicutes	Clostridia	Oscillospirales	Oscillospiraceae	Oscillospiraceae_UCG-005		649	84	0	0	30	87	38	339	316	71
Firmicutes	Clostridia	Oscillospirales	Oscillospirale	Hydrogenoanaerobacterium	Selenomonadales_bacterium_Marseille-P2399	0	0	0	0	0	0	0	54	0	0
Firmicutes	Clostridia	Oscillospirales	Oscillospirales_others			0	7	0	0	24	13	0	0	0	0
Firmicutes	Clostridia	Oscillospirales	Oscillospirales_UCG-010	Oscillospirales_UCG-010		21	8	0	0	0	0	0	11	57	0
Firmicutes	Clostridia	Oscillospirales	Ruminococcaceae	[Eubacterium]_siraeum_group		56	0	0	0	0	0	0	2	32	0
Firmicutes	Clostridia	Oscillospirales	Ruminococcaceae	Anaerofilum		0	5	0	0	0	0	0	0	0	0
Firmicutes	Clostridia	Oscillospirales	Ruminococcaceae	Anaerotruncus		0	32	0	0	21	54	0	53	0	20
Firmicutes	Clostridia	Oscillospirales	Ruminococcaceae	Angelakisella		0	0	0	0	0	0	0	11	0	5
Firmicutes	Clostridia	Oscillospirales	Ruminococcaceae	Candidatus_Soleaferrea		0	7	0	0	0	99	0	531	0	46
Firmicutes	Clostridia	Oscillospirales	Ruminococcaceae	Caproiciproducens		0	0	0	0	0	9	0	0	0	8
Firmicutes	Clostridia	Oscillospirales	Ruminococcaceae	Faecalibacterium		613	35	526	38	274	18	4929	27	604	19
Firmicutes	Clostridia	Oscillospirales	Ruminococcaceae	Negativibacillus		18	449	0	0	65	119	0	24	9	14
Firmicutes	Clostridia	Oscillospirales	Ruminococcaceae	Ruminococcaceae_DTU089		0	0	0	0	0	0	0	7	0	0
Firmicutes	Clostridia	Oscillospirales	Ruminococcaceae	Ruminococcaceae_Incertae_Sedis		61	0	7	0	13	0	64	0	16	0
Firmicutes	Clostridia	Oscillospirales	Ruminococcaceae	Ruminococcaceae_others		91	546	0	0	68	125	312	904	316	71
Firmicutes	Clostridia	Oscillospirales	Ruminococcaceae	Ruminococcaceae_UBA1819		173	75	0	1319	39	178	0	985	19	196
Firmicutes	Clostridia	Oscillospirales	Ruminococcaceae	Ruminococcus		242	109	0	3	353	8	978	0	226	0
Firmicutes	Clostridia	Oscillospirales	Ruminococcaceae	Subdoligranulum		251	163	5	0	76	97	288	0	145	0
Firmicutes	Clostridia	Peptococcales	Peptococcaceae	Peptococcaceae_others		0	3	0	0	2	31	0	9	0	18
Firmicutes	Clostridia	Peptococcales	Peptococcaceae	Peptococcus	Peptococcus_niger	0	0	0	2	0	0	0	0	0	0
Firmicutes	Clostridia	Peptostreptococcales-Tissierellales	Anaerovoracaceae	[Eubacterium]_nodatum_group		0	0	0	0	0	47	0	34	0	0
Firmicutes	Clostridia	Peptostreptococcales-Tissierellales	Anaerovoracaceae	Anaerovoracaceae_others		7	0	0	0	0	0	0	0	0	0
Firmicutes	Clostridia	Peptostreptococcales-Tissierellales	Anaerovoracaceae	Family_XIII_AD3011_group		16	59	0	0	0	16	6	177	52	82
Firmicutes	Clostridia	Peptostreptococcales-Tissierellales	Anaerovoracaceae	Family_XIII_UCG-001		16	0	0	0	0	0	44	0	7	0
Firmicutes	Clostridia	Peptostreptococcales-Tissierellales	Peptostreptococcaceae	Peptostreptococcaceae_others		29	36	0	0	116	0	519	509	628	23
Firmicutes	Clostridia	Peptostreptococcales-Tissierellales	Peptostreptococcaceae	Peptostreptococcus		0	0	0	38	0	0	0	0	0	0
Firmicutes	Clostridia	Peptostreptococcales-Tissierellales	Peptostreptococcales-Tissierellales	Peptoniphilus		0	0	0	48	0	0	0	0	0	0
Firmicutes	Clostridia	Peptostreptococcales-Tissierellales	Peptostreptococcales-Tissierellales	Tissierella		0	0	0	0	0	0	0	69	0	0
Firmicutes	Clostridia	Peptostreptococcales-Tissierellales	Sedimentibacteraceae	Sedimentibacter		0	0	0	0	0	0	0	0	0	73
Firmicutes	Firmicutes_Incertae_Sedis	Firmicutes_Incertae_Sedis_DTU014	Firmicutes_Incertae_Sedis_DTU014	Firmicutes_Incertae_Sedis_DTU014		0	0	0	0	0	76	0	27	0	0
Firmicutes	Firmicutes_others					0	0	0	0	14	44	0	0	0	0
Firmicutes	Negativicutes	Acidaminococcales	Acidaminococcaceae	Phascolarctobacterium		0	0	0	0	0	0	174	321	807	622
Firmicutes	Negativicutes	Veillonellales-Selenomonadales	Veillonellaceae	Allisonella		14	325	0	0	0	0	0	0	0	0
Firmicutes	Negativicutes	Veillonellales-Selenomonadales	Veillonellaceae	Dialister		374	46	0	494	978	82	31	0	0	0
Firmicutes	Negativicutes	Veillonellales-Selenomonadales	Veillonellaceae	Megasphaera		0	0	122	50	0	0	0	0	0	0
Firmicutes	Negativicutes	Veillonellales-Selenomonadales	Veillonellaceae	Veillonella		0	0	271	0	3	0	0	0	0	0
Fusobacteriota	Fusobacteriia	Fusobacteriales	Fusobacteriaceae	Fusobacterium		0	0	809	5321	0	0	0	0	0	0
Patescibacteria	Saccharimonadia	Saccharimonadales	Saccharimonadaceae	Saccharimonadaceae_TM7x		0	0	0	0	3	0	0	0	0	0
Proteobacteria	Alphaproteobacteria	Rhodospirillales				184	2	0	0	0	0	0	0	123	0
Proteobacteria	Gammaproteobacteria	Burkholderiales	Oxalobacteraceae	Oxalobacter		6	0	0	0	0	0	6	0	0	0
Proteobacteria	Gammaproteobacteria	Burkholderiales	Sutterellaceae	Parasutterella		121	32	0	10	0	0	7	6	13	0
Proteobacteria	Gammaproteobacteria	Burkholderiales	Sutterellaceae	Sutterella		4	0	1256	425	0	0	767	322	136	62
Proteobacteria	Gammaproteobacteria	Enterobacterales	Enterobacteriaceae	Citrobacter		0	0	0	0	0	0	0	27	0	0
Proteobacteria	Gammaproteobacteria	Enterobacterales	Enterobacteriaceae	Enterobacter		0	0	0	0	0	0	0	0	41	0
Proteobacteria	Gammaproteobacteria	Enterobacterales	Enterobacteriaceae	Enterobacteriaceae_others		20	0	0	0	0	0	0	0	102	0
Proteobacteria	Gammaproteobacteria	Enterobacterales	Enterobacteriaceae	Escherichia-Shigella	Escherichia_coli	0	0	318	3584	0	0	0	0	0	0
Proteobacteria	Gammaproteobacteria	Enterobacterales	Enterobacteriaceae	Escherichia-Shigella	Escherichia-Shigella_others	378	9055	379	4908	25	13464	8	13509	40	17654
Proteobacteria	Gammaproteobacteria	Enterobacterales	Enterobacteriaceae	Raoultella		0	0	0	0	0	0	0	0	38	0
Proteobacteria	Gammaproteobacteria	Pasteurellales	Pasteurellaceae	Haemophilus		0	0	142	0	0	0	38	0	0	0
Synergistota	Synergistia	Synergistales	Synergistaceae	Cloacibacillus		0	0	0	0	0	593	0	0	0	0
Verrucomicrobiota	Lentisphaeria	Victivallales	Victivallaceae	Victivallis	Victivallis_vadensis	0	0	0	0	0	0	0	0	2	0
Verrucomicrobiota	Verrucomicrobiae	Verrucomicrobiales	Akkermansiaceae	Akkermansia		2620	107	0	0	116	2159	230	2619	0	0
